# Supplementary material for: Defining Movement Instabilities in Yips Golfers Using Motion Capture and Muscle Synergies.
Source: Research Square preprint supplement (doi:10.21203/rs.3.rs-132954/v1), 2020-12-31
Supplement: Supplementary file 2 [file 30880eed16f42dd306cc4696.docx]

**Tables**

**Table-1**

| **Golfers ID** | **Age** | **Golfing**  **experience (years)** | **Symptom duration (years)** | **Response during experiment for yips shots classification** | **Anxiety tests** | |
| --- | --- | --- | --- | --- | --- | --- |
| **TAIS score** | **SCA  test** |
| S_01 | 53 | 35 | 5 | "Arm freezes, doesn’t appear to move smoothly" | 44 | 22 |
| S_02 | 48 | 30 | 4 | "Tensed, bit stressed, club movement feels slightly sticky" | 50 | 20 |
| S_03 | 54 | 36 | 10 | "Club feels like it rotates to the same side, like a twitch" | 42 | 19 |
| S_04 | 37 | 18 | 3 | "Stressed, arm feels cramped, gripped too tight, movement not smooth" | 45 | 27 |
| S_05 | 73 | 40 | 5 | "Feeling of ball not being hit where I want it to" | 34 | 18 |
| S_06 | 45 | 30 | 10 | "Movement not smooth, getting stressed when focused for too long" | 66 | 27 |
| S_07 | 84 | 45 | 25 | "Shots are too strong, too fast sometimes, grip and arm feel tight" | 52 | 25 |
| S_08 | 53 | 41 | 28 | “Slightly cramped in arm during backswing” | 49 | 14 |
| S_09 | 47 | 23 | 4 | “Arms feel cramped, tightened, stressed when focused for long.” | 37 | 20 |
| S_10 | 59 | 36 | 31 | “Shots feel shifted involuntary, arm feels cramped and tensed, shots too strong” | 27 | 11 |
| S_11 | 38 | 25 | 2 | “Shots not smooth, downswing feels stuck” | 51 | 22 |
| S_12 | 41 | 31 | 15 | “Shots too strong, arms feel rigid and tensed” | 56 | 24 |
| S_13 | 59 | 42 | 8 | “Arm appears to freeze, shots appear shifted, tension in arms during downswing” | 61 | 25 |
| S_14 | 48 | 24 | 18 | “Downswing not smooth, twitches during downswing in both hands” | 60 | 25 |
| S_15 | 54 | 48 | 28 | “Shots too strong, grip intentionally strong, forearm tightened” | 54 | 22 |

*Table 1 legend: TAIS score - Trait Anxiety Inventory in Sports score (range 25 to 100 = low to high anxiety), SCA test - Sports Competition Anxiety test (<17 low anxiety, >24 high anxiety)*

**Table-2**

| **Golfer ID** | **Total yips trials** | **Angular velocity** | | |  | **Muscle synergy** | | | | |
| --- | --- | --- | --- | --- | --- | --- | --- | --- | --- | --- |
| (SPM paired t-test) | | |  | (Neural coefficients (C) - SPM paired t-test) | | | | |
| *t* value* | *p value* | *Affected time (pre-impact)* |  | *Affected arm* | *dF* | *Synergy number* | *t* value* | *p value* |
| S_01 | 8 | 6.75 | **0.033** | 170 ms |  | Left | 1, 7 | 2 | 3.71 | **0.012** |
| S_02 | 7 | N.S | N.S | N.S |  | N.S | N.S | N.S | N.S | N.S |
| S_03 | 8 | 5.67 | **0.013** | 160 ms |  | N.S | N.S | N.S | N.S | N.S |
| S_04 | 13 | 4.33 | **0.048** | 80 ms |  | Right | 1, 12 | 1 | 3.34 | **0.009** |
| S_05 | 8 | 6.27 | **0.046** | 265 ms |  | Left | 1, 7 | 2 | 4.18 | **0.046** |
| S_06 | 8 | N.S | N.S | N.S |  | Left | 1, 7 | 2 | 3.90 | **0.041** |
| S_07 | 7 | N.S | N.S | N.S |  | N.S | N.S | N.S | N.S | N.S |
| S_08 | 10 | 5.13 | **0.024** | 175 ms |  | Left | 1, 9 | 2 | 3.38 | **0.019** |
| S_09 | 9 | 6.71 | **0.044** | 10 ms |  | Left | 1, 7 | 2 | 3.81 | **0.036** |
| S_10 | 22 | N.S | N.S | N.S |  | Right | 1, 17 | 2 | 2.94 | **0.034** |
| S_11 | 8 | 5.84 | **0.024** | 210 ms |  | Right | 1, 7 | 1 | 4.02 | **0.000** |
| S_12 | 8 | N.S | N.S | N.S |  | Right | 1, 7 | 1 | 3.79 | **0.000** |
| S_13 | 9 | 5.74 | **0.022** | 15 ms |  | Right | 1, 8 | 1 | 3.77 | **0.001** |
| S_14 | 11 | 4.89 | **0.010** | 190 ms |  | Left | 1, 10 | 2 | 3.37 | **0.026** |
| S_15 | 15 | N.S | N.S | N.S |  | N.S | N.S | N.S | N.S | N.S |

*Table 2 legend: SPM – 1-dimension Statistical Parametric Mapping, dF = Degrees of freedom, t* value – threshold set for alpha = 0.05, N.S – Not significant, ms = milliseconds.*
